# Supplementary material for: Performance Analysis of Deep Learning CNN Models for Variety Classification in Hazelnut
Source: MDPI journal article supplement (doi:10.3390/su13126527), 2021-06-08
Supplement: s1 [file s1]

# Codes and Mathematical Expressions

## Codes:

```
DATA_DIR = "../input/data-zel-d2-17-3/data_özel_D2_17_3"
TRAINING_DIR = DATA_DIR + "/train"
VALIDATION_DIR = DATA_DIR + "/val"
TEST_DIR = DATA_DIR + "/test"
```

```
BATCH_SIZE=100
EPOCHS=200
PATIENCE=100
SHOW_MISTAKEN_PREDICTIONS=True
```

```
IMG_WIDTH=150
IMG_HEIGHT=150
```

```
training_datagen = ImageDataGenerator(rescale = 1./255)
validation_datagen = ImageDataGenerator(rescale = 1./255)
```

```
train_generator = training_datagen.flow_from_directory(
    TRAINING_DIR,
    target_size=(IMG_WIDTH, IMG_HEIGHT),
    batch_size=BATCH_SIZE,
    class_mode='categorical')
```

```
validation_generator = validation_datagen.flow_from_directory(
    VALIDATION_DIR,
    target_size=(IMG_WIDTH, IMG_HEIGHT),
    batch_size=BATCH_SIZE,
    class_mode='categorical',
    shuffle=False)
```

```
number_of_classes=len(list(train_generator.class_indices.keys()))
model = Sequential([
    # Note the input shape is the desired size of the image 150x150 with 3 bytes color
    # This is the first convolution
    Conv2D(32, (3,3), activation='relu', input_shape=(IMG_WIDTH, IMG_HEIGHT, 3)),
    MaxPooling2D(2, 2),
    # The second convolution
    Conv2D(64, (3,3), activation='relu'),
    MaxPooling2D(2,2),
    # The third convolution
    Conv2D(128, (3,3), activation='relu'),
    MaxPooling2D(2,2),
    # The fourth convolution
    Conv2D(128, (3,3), activation='relu'),
    MaxPooling2D(2,2),
```

```

        # Flatten the results to feed into a DNN
        Flatten(),
        Dropout(0.5),
        # 512 neuron hidden layer
        Dense(512, activation='relu'),
        Dense(number_of_classes, activation='softmax')
    ])

```

```

model.compile(loss = 'categorical_crossentropy', optimizer='adam', metrics=['accuracy'])

callbacks = [EarlyStopping(monitor='val_loss', mode='min',patience=PATIENCE),
             ModelCheckpoint(filepath='best_model.h5', monitor='val_loss',mode
             ='min', save_best_only=True,verbose=1)]

history = model.fit_generator(train_generator,
                              epochs=EPOCHS,
                              callbacks=callbacks,
                              validation_data = validation_generator,
                              steps_per_epoch=train_generator.samples // BATCH
                              _SIZE,
                              validation_steps=validation_generator.samples //
                              BATCH_SIZE,
                              verbose = 1)

```

```

acc = history.history['accuracy']
val_acc = history.history['val_accuracy']
loss = history.history['loss']
val_loss = history.history['val_loss']

epochs = range(len(acc))

plt.plot(epochs, acc, 'r', label='Training accuracy')
plt.plot(epochs, val_acc, 'b', label='Validation accuracy')
plt.title('Training and validation accuracy')
plt.legend(loc=0)
plt.figure()

plt.plot(epochs, loss, 'r', label='Training Loss')
plt.plot(epochs, val_loss, 'b', label='Validation Loss')
plt.title('Training and validation loss')
plt.legend()

plt.show()

```

```

def plot_confusion_matrix(cm,
                          target_names,
                          title='Confusion matrix',
                          cmap=None,
                          normalize=True):
    accuracy = np.trace(cm) / float(np.sum(cm))
    misclass = 1 - accuracy

```

```

if cmap is None:
    # Greys, Purples, Blues, Greens, Oranges, Reds, YLorBr, YLorRd, OrRd,
    # PuRd, RdPu, BuPu, GnBu, PuBu, YLGnBu, PuBuGn, BuGn, YLGn
    cmap = plt.get_cmap('YlGn')

plt.figure(figsize=(8, 6))
plt.imshow(cm, interpolation='nearest', cmap=cmap)
plt.title(title)
plt.colorbar()

if target_names is not None:
    tick_marks = np.arange(len(target_names))
    plt.xticks(tick_marks, target_names, rotation=90)
    plt.yticks(tick_marks, target_names)

if normalize:
    cm = cm.astype('float') / cm.sum(axis=1)[:, np.newaxis]

thresh = cm.max() / 1.5 if normalize else cm.max() / 2
for i, j in itertools.product(range(cm.shape[0]), range(cm.shape[1])):
    if normalize:
        plt.text(j, i, "{:0.4f}".format(cm[i, j]),
                  horizontalalignment="center",
                  color="white" if cm[i, j] > thresh else "black")
    else:
        plt.text(j, i, "{:,}".format(cm[i, j]),
                  horizontalalignment="center",
                  color="white" if cm[i, j] > thresh else "black")

plt.tight_layout()
plt.ylabel('True label')
plt.xlabel('Predicted label\naccuracy={:0.4f}; misclass={:0.4f}'.format(accuracy, misclass))
plt.show()

```

```

def results_for(model_file,
                data_generator,
                caption ):
    model = tf.keras.models.load_model(model_file)
    test_loss, test_acc = model.evaluate_generator(data_generator)
    print(caption, ' acc:', test_acc)
    print(caption, ' loss:', test_loss)
    # Confusion matrix
    num_of_samples=data_generator.samples
    batch_size=20
    Y_pred = model.predict_generator(data_generator, num_of_samples // batch_size)
    y_pred = np.argmax(Y_pred, axis=1)
    #print(y_pred)
    #print('Confusion Matrix')
    cm=confusion_matrix(data_generator.classes, y_pred)

```

```

    #print(cm)

    target_names=data_generator.class_indices.keys()
    plot_confusion_matrix(cm,normalize = False,target_names=target_names,title
= "Confusion Matrix")
    print('Classification Report')
    print('-----')
    print(classification_report(data_generator.classes, y_pred, target_names=t
arget_names))

    # List the mistaken predictions
    if SHOW_MISTAKEN_PREDICTIONS:
        print('\nMistaken predictions')
        print('-----')
        filenames=data_generator.filenames
        errors=np.where(y_pred!=data_generator.classes)[0]
        error_count=len(errors)
        for error in errors:
            predicted=list(data_generator.class_indices.keys())[list(data_gene
rator.class_indices.values()).index(y_pred[error])]
            print("Picture:",filenames[error]," Misprediction ==>", predicted)

test_datagen = ImageDataGenerator(rescale=1./255)
test_generator = test_datagen.flow_from_directory(TEST_DIR,target_size=(150, 1
50),shuffle=False,batch_size=500,class_mode='categorical')

results_for('best_model.h5',test_generator,"test")

results_for('best_model.h5',validation_generator,"validation")

```

## Some Mathematical Expressions

The  $l^{th}$  feature map is computed as follows:

$$Y_i^{(l)} = B_i^{(l)} + \sum_{j=1}^{m_1^{(l-1)}} K_{ij}^{(l)} * B_j^{(l-1)}$$

There is a bank of  $m_1$  filters and the output  $Y_i^{(l)}$  of the  $l^{th}$  layer consists of  $m_i^{(l)}$  feature maps of size  $m_2^{(l)} \times m_3^{(l)}$ .

The convolution operation is widely used in digital image processing where the 2D matrix representing the image (I) is convolved with the smaller 2D kernel matrix (K), then the mathematical formulation with zero padding is given:

$$S_{i,j} = (I * K)_{i,j} = \sum_m \sum_n I_{i,j} \cdot K_{i-m,j-n}$$

The operation of the activation function  $f()$  is as follows:

$$\phi(Y_i^{(l)}) = f\left(B_i^{(l)} + \sum_{j=1}^{m_1^{(l-1)}} K_{ij}^{(l)} * Y_j^{(l-1)}\right)$$

ReLU is the most used activation function for convolution layers. It is mathematically defined as:

$$f(x) = \begin{cases} 0 & \text{if } x < 0 \\ x & \text{if } x \geq 0 \end{cases}$$

Max pooling: Mathematically it has the form:

$$f_{max}(A) = \max_{n \times m}(A_{n \times m})$$
